# Supplementary material for: A review of European studies on pollination networks and pollen limitation, and a case study designed to fill in a gap
Source: PubMed Central journal article supplement (PMC6302952; doi:10.1093/aobpla/ply068), 2018-10-31
Supplement: ply068_suppl_supplementary_information_s3.pdf [file ply068_suppl_supplementary_information_s3.pdf]

**Supporting Information Table S3:** A list of all butterfly species observed in the meadow. Family, genus and species are recorded with some species being indistinguishable from each other grouped together and are listed in alphabetical order by genus. Species were appointed abundance categories based on the number of individuals observed in the meadow. 1-2 individuals were recorded as very rare, 3-9 rare, 10-50 common, and 50-1000 very common.

| Genus                    | Species                                              | Family      | Abundance category |
|--------------------------|------------------------------------------------------|-------------|--------------------|
| <i>Adscita/Jordanita</i> |                                                      | Zygaenidae  | Common             |
| <i>Aphantopus</i>        | <i>hyperantus</i>                                    | Nymphalidae | Very Common        |
| <i>Argynnis</i>          | <i>adippe</i>                                        | Nymphalidae | Rare               |
| <i>Argynnis</i>          | <i>aglaja</i>                                        | Nymphalidae | Very Rare          |
| <i>Argynnis</i>          | <i>niobe</i>                                         | Nymphalidae | Very Common        |
| <i>Argynnis</i>          | <i>paphia</i>                                        | Nymphalidae | Very Rare          |
| <i>Autographa</i>        | <i>bractea</i>                                       | Noctuidae   | Very Rare          |
| <i>Boloria</i>           | <i>euphrosyne</i>                                    | Nymphalidae | Rare               |
| <i>Brentis</i>           | <i>ino</i>                                           | Nymphalidae | Very Rare          |
| <i>Coenonympha</i>       | <i>glycerion</i>                                     | Satyridae   | Very Common        |
| <i>Coenonympha</i>       | <i>pamphilus</i>                                     | Satyridae   | Rare               |
| <i>Cupido</i>            | <i>minimus</i>                                       | Lycaeidae   | Common             |
| <i>Erebia</i>            | <i>euryle</i>                                        | Nymphalidae | Very Rare          |
| <i>Erebia</i>            | <i>ligea</i>                                         | Nymphalidae | Rare               |
| <i>Erebia</i>            | <i>medusa</i>                                        | Nymphalidae | Common             |
| <i>Gonepteryx</i>        | <i>rhamni</i>                                        | Pieridae    | Very Rare          |
| <i>Issoria</i>           | <i>lathonia</i>                                      | Nymphalidae | Very Rare          |
| <i>Leiptidea</i>         | <i>reali/juvernica</i>                               | Pieridae    | Very Rare          |
| <i>Limenitis</i>         | <i>camilla</i>                                       | Nymphalidae | Rare               |
| <i>Lycaena</i>           | <i>alciphron</i>                                     | Lycaeidae   | Common             |
| <i>Lycaena</i>           | <i>virgauerae</i>                                    | Lycaeidae   | Very Common        |
| <i>Maculinea</i>         | <i>alcon</i>                                         | Lycaeidae   | Common             |
| <i>Maniola</i>           | <i>jurtina</i>                                       | Satyridae   | Very Common        |
| <i>Melanargia</i>        | <i>galathea</i>                                      | Satyridae   | Very Common        |
| <i>Melitaea</i>          | <i>athalia/britomartis/aurelia/part<br/>henoides</i> | Nymphalidae | Common             |
| <i>Neptis</i>            | <i>rivularis</i>                                     | Nymphalidae | Very Rare          |
| <i>Nymphalis</i>         | <i>io</i>                                            | Nymphalidae | Rare               |
| <i>Nymphalis</i>         | <i>urticae</i>                                       | Nymphalidae | Very Rare          |
| <i>Ochlodes</i>          | <i>sylvanus</i>                                      | Hesperiidae | Rare               |
| <i>Polyommatus</i>       | <i>dorylas</i>                                       | Nymphalidae | Rare               |
| <i>Polyommatus</i>       | <i>icarus</i>                                        | Nymphalidae | Common             |
| <i>Pyrgus</i>            | <i>alveus/armoricanus</i>                            | Hesperiidae | Very Rare          |
| <i>Satyrrium</i>         | <i>w-album</i>                                       | Lycaeidae   | Very Rare          |
| <i>Scotopteryx</i>       | <i>chenopodiata</i>                                  | Geometridae | Very Rare          |
| <i>Thymelicus</i>        | <i>sylvestris</i>                                    | Hesperiidae | Rare               |

*Zygaena*  
*Zygaena*  
*Zygaena*

*filipendulae*  
*lonicera*  
*purpuralis/minos*

Zygaenidae    Common  
Zygaenidae    Very Rare  
Zygaenidae    Very Common
