# Supplementary material for: A review of European studies on pollination networks and pollen limitation, and a case study designed to fill in a gap
Source: PubMed Central journal article supplement (PMC6302952; doi:10.1093/aobpla/ply068), 2018-10-31
Supplement: ply068_suppl_supplementary_table_s2.pdf [file ply068_suppl_supplementary_table_s2.pdf]

**Supporting Information Table S2:** A list of all plant species recorded

flowering in the meadow, if they were considered highly abundant (over 50 blooming individuals), included in the pollen limitation and breeding experiments, whether they are priorities for conservation and included in the habitat directive (Habitats Directive 1992) and their societal use (IUCN 2015).

| Accepted species name<br>(Species Code)      | Abundant | Experiment | Habitat<br>directive | Use                   |
|----------------------------------------------|----------|------------|----------------------|-----------------------|
| <i>Campanula serrata</i> (Camser)            | y        | y          | Y                    |                       |
| <i>Cirsium erisithales</i> (Cireri)          | y        | y          |                      |                       |
| <i>Dianthus carthusianorum</i><br>(Diacar)   | y        | y          |                      |                       |
| <i>Helianthemum nummularium</i><br>(Helnum)  | y        | y          |                      |                       |
| <i>Hypericum perforatum</i> (Hypper)         | y        | y          |                      | medicinal             |
| <i>Lotus corniculatus</i> (Lotcor)           | y        | y          |                      |                       |
| <i>Scabiosa columbaria</i> (Scacol)          | y        | y          |                      |                       |
| <i>Sonchus arvensis</i> (Sonarv)             | y        | y          |                      |                       |
| <i>Trollius europaeus</i> (Troeur)           | y        | y          |                      |                       |
| <i>Achillea millefolium</i> (Achmil)         | y        |            |                      | medicinal, feed, food |
| <i>Arnica montana</i> (Arnmon)               | y        |            | Y                    | medicinal             |
| <i>Astrantia major</i> (Astmaj)              | y        |            |                      | medicinal             |
| <i>Campanula persicifolia</i><br>(Camper)    | y        |            |                      |                       |
| <i>Centaurea phrygia</i> (Cenphr)            | y        |            |                      |                       |
| <i>Euphrasia rostkoviana</i> (Eurros)        | y        |            |                      | medicinal             |
| <i>Galium album</i> (Galalb)                 | y        |            |                      |                       |
| <i>Galium verum</i> (Galver)                 | y        |            |                      | food, medicinal       |
| <i>Gentianella austriaca</i> (Genaus)        | y        |            |                      |                       |
| <i>Heracleum sphondylium</i><br>(Hersph)     | y        |            |                      |                       |
| <i>Knautia dipsacifolia</i> (Knadip)         | y        |            |                      |                       |
| <i>Leontodon hispidus</i> (Leohis)           | y        |            |                      |                       |
| <i>Leucanthemum vulgare</i> (Leuvul)         | y        |            |                      |                       |
| <i>Melampyrum sylvaticum</i> (Melsyl)        | y        |            |                      |                       |
| <i>Pimpinella major</i> (Pimmaj)             | y        |            |                      |                       |
| <i>Polygala vulgaris</i> (Polvul)            | y        |            |                      | medicinal             |
| <i>Potentilla erecta</i> (Potere)            | y        |            |                      |                       |
| <i>Salvia verticillata</i> (Salver)          | y        |            |                      |                       |
| <i>Scorzoneroides autumnalis</i><br>(Scoaut) | y        |            |                      |                       |
| <i>Stellaria graminea</i> (Stegra)           | y        |            |                      |                       |
| <i>Thymus pulegioides</i> (Thypul)           | y        |            |                      |                       |
| <i>Trifolium pratense</i> (Tripra)           | y        |            |                      | food                  |
| <i>Trifolium montanum</i> (Trimon)           | y        |            |                      |                       |

|                                                     |   |                 |
|-----------------------------------------------------|---|-----------------|
| <i>Viola declinata</i> (Viodec)                     | y |                 |
| <i>Aconitum vulparia</i> (Acovul)                   |   |                 |
| <i>Alchemilla monticola</i> (Alcmon)                |   |                 |
| <i>Anacamptis coriophora</i> (Anacor)               |   | food            |
| <i>Antennaria dioica</i> (Antdio)                   |   | medicinal       |
| <i>Anthyllis vulneraria</i> (Antvul)                |   |                 |
| <i>Aspilia floribunda</i> (Aspflo)                  |   |                 |
| <i>Campanula patula subsp. Abietina</i><br>(Campat) |   |                 |
| <i>Campanula rapunculoides</i><br>(Camrap)          |   |                 |
| <i>Carum carvi</i> (Carcar)                         |   | food, medicinal |
| <i>Clinopodium vulgare</i> (Clivul)                 |   | medicinal       |
| <i>Dactylorhiza maculata</i> (Dacmac)               |   | food            |
| <i>Dactylorhiza majalis</i> (Dacmaj)                |   | food            |
| <i>Dianthus barbatus</i> (Diabar)                   |   |                 |
| <i>Digitalis grandiflora</i> (Diggra)               |   | medicinal       |
| <i>Doronicum austriacum</i> (Doraus)                |   |                 |
| <i>Filipendula ulmaria</i> (Filulm)                 |   | medicinal       |
| <i>Galeopsis ladanum</i> (Gallad)                   |   |                 |
| <i>Galium mollugo</i> (Galmol)                      |   |                 |
| <i>Gentiana cruciata</i> (Gencru)                   |   |                 |
| <i>Gnaphalium sylvaticum</i> (Gnasy)                |   |                 |
| <i>Gymnadenia conopsea</i><br>(Gymcon)              |   |                 |
| <i>Jacobaea vulgaris</i> (Jacvul)                   |   |                 |
| <i>Laserpitium latifolium</i> (Laslat)              |   |                 |
| <i>Lathyrus pratensis</i> (Latpra)                  |   |                 |
| <i>Linum catharticum</i> (Lincat)                   |   |                 |
| <i>Neottia ovata</i> (Neoova)                       |   |                 |
| <i>Medicago falcata</i> (Medfal)                    |   |                 |
| <i>Medicago lupulina</i> (Medlup)                   |   |                 |
| <i>Myosotis scorpioides</i> (Myosco)                |   |                 |
| <i>Neotinea ustulata</i> (Neoust)                   |   | food, medicinal |
| <i>Origanum vulgare</i> (Orivul)                    |   | medicinal       |
| <i>Parnassia palustris</i> (Parpal)                 |   | medicinal       |
| <i>Pilosella aurantiaca</i> (Pilaur)                |   |                 |
| <i>Pilosella officinarum</i> (Piloff)               |   | medicinal       |
| <i>Pimpinella saxifraga</i> (Pimsax)                |   | food            |
| <i>Podospermum roseum</i> (Podros)                  |   |                 |
| <i>Polygala nicaeensis</i> (Polnic)                 |   |                 |
| <i>Prunella vulgaris</i> (Pruvul)                   |   | medicinal       |
| <i>Ranunculus acris</i> (Ranacr)                    |   |                 |
| <i>Rhinanthus minor</i> (Rhimin)                    |   |                 |
| <i>Rhinanthus rumelicus</i> (Rhirum)                |   |                 |
| <i>Rumex acetosa</i> (Rumace)                       |   |                 |

*Sanguisorba minor* (Sanmin)

medicinal

*Sedum hispanicum* (Sedhis)

*Silene nutans* subsp. *dubia*  
(Silnut)

*Stachys alpina* (Staalp)

*Tragopogon orientalis* (Traori)

*Trifolium aureum* (Triaur)

*Trifolium ochroleucon* (Triocho)

*Trifolium repens* (Trirep)

*Verbascum nigrum* (Vernig)

*Vicia cracca* (Viccra)

*Viola tricolor* (Viotri)
